# 1 The occurrence of cardiovascular complications 2 associated with SARS-CoV-2 infection: a systematic 3 review

4 Daniele Melo Sardinha<sup>1\*</sup>, Karla Valéria Batista Lima<sup>2,3</sup>, Thalyta Mariany Rêgo Lopes Ueno<sup>2</sup>, Yan  
5 Correa Rodrigues<sup>2,3</sup>, Juliana Conceição Dias Garcez<sup>2</sup>, Anderson Lineu Siqueira dos Santos<sup>2,3</sup>, Ana  
6 Lúcia da Silva Ferreira<sup>4</sup>, Ricardo José de Paula Souza e Guimarães<sup>1,5</sup>, Luana Nepomuceno Gondim  
7 Costa Lima<sup>1,2,3</sup>

8 <sup>1</sup> Programa de Pós-Graduação em Epidemiologia e Vigilância em Saúde (PPGEVS), Instituto Evandro Chagas  
9 (IEC), Ananindeua 67030-000, Brazil; danielle-vianna20@hotmail.com; ricardoguimaraes@iec.gov.br;  
10 luanalima@iec.gov.br.

11 <sup>2</sup> Programa de Pós-Graduação em Biologia Parasitária na Amazônica (PPGBPA), Instituto Evandro Chagas  
12 (IEC) e Universidade do Estado do Pará (UEPA), Belém 66087-670, Brazil; karlalima@iec.gov.br;  
13 thalyta\_mlopes@hotmail.com; Yan.13@hotmail.com; juliana.garcez@famaz.edu.br;  
14 andersonlineu@gmail.com.

15 <sup>3</sup> Seção de Bacteriologia e Micologia (SABMI), Instituto Evandro Chagas (IEC), Ananindeua 67030-000, Brazil.

16 <sup>4</sup> Secretaria de Estado de Saúde Pública do Pará (SESPA), Belém, 66017-000, Brazil;  
17 analucia.ferreira@sespa.pa.gov.br.

18 <sup>5</sup> Laboratório de Geoprocessamento, Instituto Evandro Chagas (IEC), Ananindeua 67030-000, Brazil;

19 \* Correspondence: danielle-vianna20@hotmail.com; Tel.: +55 91998188790 (DMS)

20 **Abstract:** The Cardiovascular Diseases represent the main cause of death in the world, and are  
21 associated as risk factors that cause serious complications in cases of infections, such as those of the  
22 respiratory tract. In March 2020 the World Health Organization declared a pandemic for  
23 SARS-CoV-2, a new coronavirus causing severe pneumonia, which emerged in December 2019 in  
24 Wuhan, China. The objective is to investigate the occurrence of cardiovascular complications  
25 associated with SARS-CoV-2 infection. It is a systematic review, quantitative, in the databases,  
26 PubMed and Science direct, including primary studies with hospitalized patients confirmed for  
27 COVID-19 and who presented cardiovascular complications, form used tools for evaluation of  
28 quality and evidence, following the PRISMA recommendations. Results: 12 studies were included.  
29 The occurrence of cardiovascular complications was: 27.35% of the sample of 3,316 patients. Types:  
30 Acute cardiac injury 17.09%; Thromboembolism 4.73%; Heart failure 3.43%; Arrhythmias 1.77%;  
31 Brain stroke 0.33%. Mean age 61 years. Conclusions: This study showed that there are several  
32 cardiovascular complications associated with SARS-CoV-2, that the main one is the acute cardiac  
33 injury, which causes several instabilities in the cardiopulmonary system, and that it is associated  
34 with mortality.

35 **Keywords:** Cardiovascular Complications; COVID-19; SARS-CoV-2.

---

## 37 1. Introduction

38 The Cardiovascular Diseases (CD) are a set of pathological conditions involving the  
39 cardiovascular system, such as: Coronary Arterial Disease (CAD), Cardiac Arrhythmias,  
40 Valvopathy, Inflammatory Heart Disease, Heart Failure (HF), Vascular Brain Injury (VBI),  
41 Pulmonary Embolism (PE), and Deep Venous Thrombosis (DVT). However, some risk factors,  
42 modifiable and non-modifiable, potentiate or cause cardiovascular events, among them: Systemic  
43 Arterial Hypertension (SAH), Diabetes Mellitus (DM), Dyslipidemias, Sedentarism, Obesity, Stress,  
44 Hormone replacement therapy, Smoking, Family history of CD, Sex, Age and Heredity[1,2].

45 Thus, CD represents a major public health problem, since it is the leading cause of death,  
46 accounting for 17.7 million deaths worldwide in 2015, representing 31% of all deaths globally. The  
47 main cause of deaths is CAD [3,4].

48 In this context, previous research has shown a transient risk of acute vascular events, including  
49 myocardial infarction and cardiovascular deaths, after clinically diagnosed Acute Respiratory  
50 Infections (ARI). Influenza vaccine has been shown to minimize the risk of major adverse cardiac  
51 events among people with pre-existing cardiovascular disease. Studies have shown that influenza  
52 epidemics are associated with cardiovascular mortality in subtropical and tropical climates. Thus,  
53 seasonal mortality from all causes, specifically in the elderly, has been associated with several  
54 viruses, including influenza, parainfluenza, RSV and norovirus. A Dutch study suggests that these  
55 viruses account for 6.8% of deaths in people aged  $\geq 85$ , 4.4% in people aged 75-84, and 1.4% in people  
56 aged 65-74. The impact of viral respiratory infections on the cardiovascular system causing fatal  
57 events is thus evident[5,6].

58 In this sense, in December 2019, cases of influenza syndrome with evolution to ARI, of  
59 unknown etiology, were registered in China and caused concern because of the several deaths and  
60 rapid transmissibility. In January researchers isolated and identified the causative infectious agent as  
61 a Coronavirus, named at the time 2019-nCov, however, due to the similarity to SARS-CoV, another  
62 coronavirus causing ARI in humans, was renamed by the World Health Organization (WHO) as  
63 SARS-CoV-2, and respectively the disease was named Cov Disease-19 (COVID-19)[7-9].

64 Soon, COVID-19, due to the high transmissibility via respiratory droplets, in a direct and  
65 indirect way, spread to neighboring countries, and reached the level of the pandemic in March 2020  
66 declared by the WHO[10].

67 According to the studies, the clinical characteristics of COVID-19 have shown to evolve in three  
68 ways: Flu Syndrome (FS), Severe Acute Respiratory Syndrome (SARS) and Asymptomatic. In the FS  
69 it refers to the presentation of fever, cough, sore throat, coryza, nasal congestion and myalgia. In  
70 SARS, signs and symptoms of FS are associated with oxygen saturation equal to or  $< 95\%$ , beating of  
71 nose wings, diarrhea, nausea, vomiting and cyanosis. The cases of SARS represent the serious  
72 complications of COVID-19, requiring intensive care treatment and being responsible for several  
73 deaths. The following risk factors stand out for the evolution of SARS: chronic heart diseases,  
74 chronic respiratory diseases, neoplasms, elderly, pregnant women, obese people[11-13].

75 In a review study, several cardiovascular complications associated with SARS-CoV-2 infection  
76 were cited[14]. However, studies do not specify the most frequent and prevalent associated  
77 complications, so it was questioned: What is the occurrence of cardiovascular complications  
78 associated with SARS-CoV-2 infection? The objective of this research is to investigate the occurrence  
79 of cardiovascular complications associated with SARS-CoV-2 infection.

## 80 2. Materials and Methods

81 Exploratory-descriptive research, of the type Systematic Review (SR), following the PRISMA  
82 recommendations [15]. The SR is made up of five stages: 1. formulating a research question; 2.  
83 defining inclusion and exclusion criteria; 3. developing a research strategy and researching the  
84 literature - finding the studies; 4. selecting the studies; 5. evaluating the quality of the studies; 6.  
85 extracting the data; 7. summarizing the data and evaluating the quality of the evidence;[16].

86 For the elaboration of the research question, we used the PICO strategy, widely used in  
87 evidence-based practice, in which it proposes that problems identified in clinical practice, research  
88 and teaching be organized from four elements: Patient; Intervention; Comparison; Outcome (PICO).  
89 Because the construction from these elements, provides greater scope for the resolution of the  
90 problem addressed [17].

91 Research question: What is the occurrence of cardiovascular complications associated with  
92 SARS-CoV-2 infection cited in the literature? Patient: Infected with SARS-CoV-2 of any age group,  
93 hospitalized / Intervention: identify the cardiovascular complications associated with SARS-CoV-2 /  
94 Comparison: Not applicable / Outcome: Describe the occurrence of cardiovascular complications  
95 associated with SARS-CoV-2 cited in the literature.

96 For the search strategy in the literature, the following keywords were listed: cardiovascular  
97 complications; COVID-19; SARS-CoV-2. The selected databases were: PubMed, Science direct,  
98 including studies of any language, published from 2019 until the date of the search 11/07/2020.

99 Inclusion criteria: primary studies, which evaluated individuals infected by SARS-CoV-2  
100 hospitalized and presented results on cardiovascular complications, of all age groups. Exclusion  
101 criteria: studies that do not specify the cardiovascular complications that occurred quantitatively.

102 The PRISMA flowchart, a tool that is part of the PRISMA protocol, was used to visualize the  
103 search in the databases, showing how the final sample was reached, describing all the stages and  
104 inclusion and exclusion [15].

105 According to the protocol, two reviewers researched the bases independently, and critically  
106 evaluated each study from exhaustive reading in two stages, sorting by titles and abstracts/complete  
107 text. They then met twice to discuss the evaluations and decided which studies were included in the  
108 research.

109 The U.S. National Institutes of Health's Quality Assessment Tool for Observational Cohort and  
110 Cross-Sectional Studies was used to assess the quality of studies  
111 (<https://www.nhlbi.nih.gov/health-topics/study-quality-assessment-tools>) It consists of 14 questions  
112 that measure the representativeness, the type of sampling, the description and evaluation of the  
113 exposure, the participants' overbite and the adjustments and qualifications of the confounding  
114 variables. The results were discussed qualitatively among the researchers, and the disparities were  
115 solved through the discussion.

116 In the evaluation of the quality of evidence, the Oxford Centre for Evidence-Based Medicine's  
117 Quality Classification Scheme was used for studies and other evidence [18], which is based on levels  
118 1 to 5:

- 119 1- Randomized clinical trial properly fed and conducted; systematic review with meta-analysis.
- 120 2- Well designed controlled trial without randomization; comparative prospective cohort study.
- 121 3- Case control studies; retrospective cohort study.
- 122 4- Series of cases with or without intervention; transversal study.
- 123 5- Opinion of respected authorities; case reports.

124 When extracting the data, the researchers developed a form consisting of the following  
125 variables: authors and year of publication, method, quality of evidence, location, age, participants,  
126 gender, comorbidities, estimates of occurrence of cardiovascular complications evidenced in those  
127 infected by SARS-CoV-2. For data analysis, we opted for descriptive statistics, chi-square test of  
128 independence applied in the participants with the complications, to observe the most significant  
129 complications. The results were presented in tables.

### 130 3. Results

131 In PubMed, the initial search resulted in 294 articles, after the analysis by title and objective, 46  
132 were selected for reading. 7 articles were included for the data analysis [19], [20], [21], [22], [23], [24],  
133 [25]. In Science direct, 795 articles were initially searched, applying the filter for primary articles only  
134 resulted in 257. 45 were selected, and after reading 5, [26], [27], [28], [29], [30]. In figure 1 is the  
135 flowchart of the search, and in table 1 the detailing of the variables extracted from the studies.

136

137 **Figure 1** - Characterization of the search and definition of the sample in the databases.

138

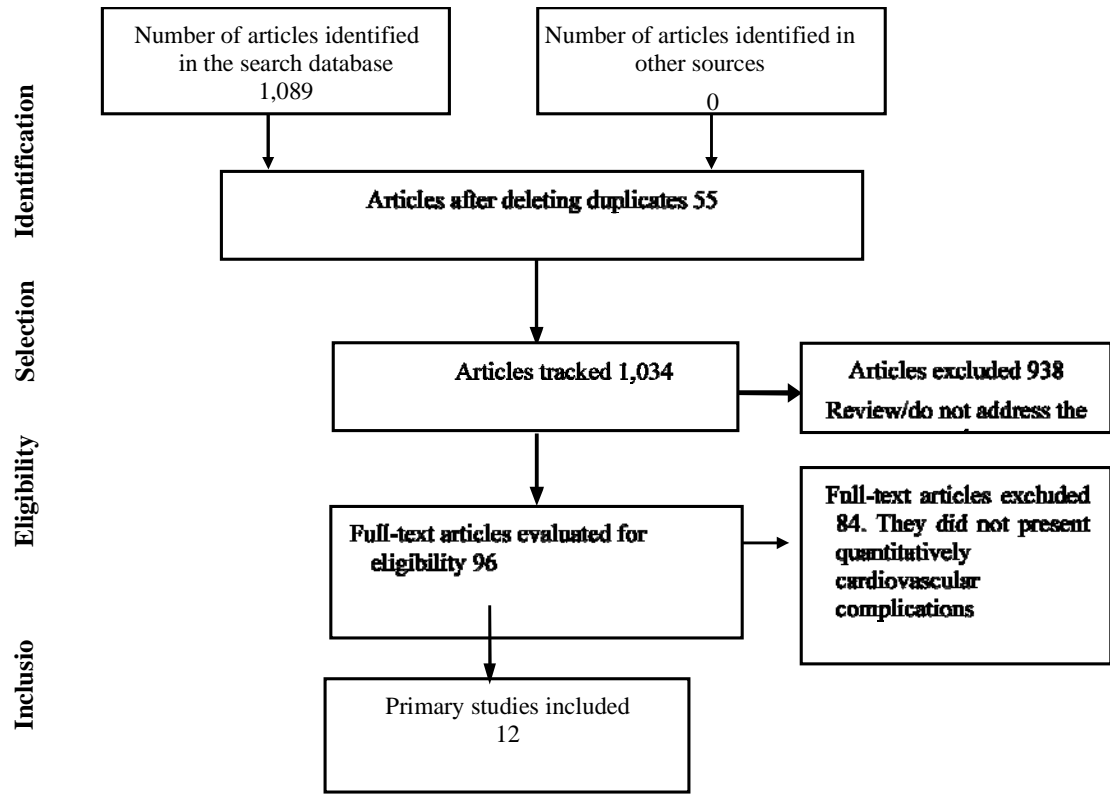

139

140 Source: Authors.

141

**Table 1.** Data extracted from the studies included in the review.

| First author and year  | Metodo                                                                                     | Quality of evidence | Location/sample | Age                            | Sex                                    | Comorbidities                                                                                                                                                                                                                                                   | The occurrence and cardiovascular complications                                      |
|------------------------|--------------------------------------------------------------------------------------------|---------------------|-----------------|--------------------------------|----------------------------------------|-----------------------------------------------------------------------------------------------------------------------------------------------------------------------------------------------------------------------------------------------------------------|--------------------------------------------------------------------------------------|
| Li et al (2020).       | Retrospective study with patients Hospitalized                                             | 3                   | China<br>548    | Average 60 years (range 48-69) | Male 279 (50,9%)<br>Female 269 (49,1%) | Chronic obstructive pulmonary disease 17 (3.1%)<br>Asthma 5 (0.9%)<br>Tuberculosis (1.6%)<br>Diabetes 83 (15.1%)<br>Hypertension 166 (30.3%)<br>Coronary heart disease 34 (6.2%)<br>Hepatitis B 5 (0.9%)<br>Chronic kidney disease 10 (1.8%)<br>Tumor 24 (4.7%) | Cardiac injury 119 (21.7%).<br>Diffuse intravascular coagulation 42 (7.7%).          |
| Wang et al (2020).     | Retrospective cohort in one hospital, all confirmed cases of COVID-19 over 60 years of age | 3                   | China<br>339    | Average 71 years (> 60)        | Male 166 (49%)<br>Female 173 (51%)     | Heart Disease 53 (15.7%)<br>Hypertension 138 (40.8%)<br>Diabetes 54 (16%)<br>Kidney Disease 13 (3.8%)<br>Chronic Liver Disease 2 (0.6%)<br>Pneumopathy 21 (6.2%)<br>Autoimmune disease 5 (1.5%).                                                                | Acute cardiac injury 70 (21.0%)<br>Arrhythmia 35 (10.4%)<br>Heart failure 58 (17.4%) |
| Inciardi et al (2020). | Retrospective cohort with hospitalized patients                                            | 3                   | Italy<br>99     | Average 67                     | Male 80 (81%)<br>Female 19 (19%)       | Hypertension 63 (64%)<br>Dyslipidemia 29 (30%)<br>Diabetes 30 (31%)<br>Heart failure 21 (21%)<br>Atrial fibrillation 19 (19%)<br>Coronary artery disease 16 (16%)                                                                                               | Venous thromboembolism 12 (12%)<br>Arterial thromboembolism 3 (3%)                   |

|                    |                                                            |   |              |                   |                                        |                                                                                                                                                                                                                                                                                                |                                                   |
|--------------------|------------------------------------------------------------|---|--------------|-------------------|----------------------------------------|------------------------------------------------------------------------------------------------------------------------------------------------------------------------------------------------------------------------------------------------------------------------------------------------|---------------------------------------------------|
|                    |                                                            |   |              |                   |                                        | Chronic obstructive pulmonary disease 9 (9%)<br>Chronic kidney disease 15 (15%) Cancer 17 (18%)                                                                                                                                                                                                |                                                   |
| Shi et al (2020a). | Retrospective study with hospitalized patients             | 3 | China<br>671 | Median 63 (50–72) | Male 322 (48%)<br>Female 349 (52%)     | Hypertension 199 (29.7%)<br>Diabetes 97 (14.5%)<br>Coronary heart disease 60 (8.9%)<br>Chronic kidney disease 28 (4.2%)<br>Chronic obstructive pulmonary disease 23 (3.4%)<br>Cancer 23 (3.4%)<br>Heart Failure 22 (3.3%)<br>Cerebrovascular disease 22 (3.3%)<br>Atrial fibrillation 7 (1.0%) | Myocardial injury 106 (15.8%)<br>Heart Failure 12 |
| Li et al (2020).   | Retrospective observational study of hospitalized patients | 3 | China<br>219 | Median 53         | Male 89 (39.7%)<br>Female 130 (60,3%)  | Hypertension 55 (25.1%)<br>Diabetes 31 (14.2%)<br>Heart disease 17 (7,8%)                                                                                                                                                                                                                      | Stroke 11 (5%)                                    |
| Shi et al (2020b). | Cohort with hospitalized                                   | 3 | China<br>416 | Median 64 (21-95) | Male 205 (49,3%)<br>Female 211 (50,7%) | Hypertension 127 (30.5%)<br>Diabetes 60 (14.4%)<br>Coronary heart disease 44 (10.6%)<br>Cerebrovascular disease 22 (5.3%)<br>Heart Failure 17 (4.1%)<br>Chronic renal failure 14 (3.4%)                                                                                                        | Cardiac Injury 82 (19,7%).                        |

|                     |                                                               |   |              |                       |                                        |                                                                                                                                                                                                                             |                                                                                  |
|---------------------|---------------------------------------------------------------|---|--------------|-----------------------|----------------------------------------|-----------------------------------------------------------------------------------------------------------------------------------------------------------------------------------------------------------------------------|----------------------------------------------------------------------------------|
|                     |                                                               |   |              |                       |                                        | Chronic obstructive pulmonary disease 12 (2.9%)<br>Cancer 9 (2.2%)                                                                                                                                                          |                                                                                  |
| Guo et al (2020).   | Series of hospitalized cases                                  | 3 | China<br>187 | Average 58<br>(14-66) | Male 91 (48.7%)<br>Female 96 (51.3%)   | Hypertension 61 (32.6%)<br>Coronary Heart Disease 21 (11.2%)<br>Cardiomyopathy 8 (4.3%)<br>Diabetes 28 (15.0%)<br>Chronic obstructive pulmonary disease 4 (2.1%)<br>Malignancy 13 (7.0%)<br>Chronic kidney disease 6 (3.2%) | Myocardial injury 52 (27.8%)<br>Coagulopathy 42 (34.1%)                          |
| Yang et al (2020).  | Observational study of hospitalized patients                  | 3 | China<br>200 | Average 55            | Male 98 (49%)<br>Female 102 (51%)      | Hypertension 45 (22.5%)<br>Chronic lung disease 7 (3.5%)<br>Diabetes 21 (10.5%)<br>Chronic heart disease 11 (5.5%)<br>Chronic kidney disease 3 (1.5%)<br>Chronic liver disease 2 (1%)                                       | Acute cardiac injury 20 (10%)                                                    |
| Zhou et al (2020).  | Retrospective and multicenter cohort study, with hospitalized | 3 | China<br>191 | Average 56<br>(18-87) | Male 119 (62%)<br>Female 72 (38%)      | Hypertension 58 (30%)<br>Diabetes 36 (19%)<br>Coronary heart disease 15 (8%)<br>Chronic obstructive pulmonary disease 6 (3%)<br>Carcinoma 2 (1%)                                                                            | Heart failure 44 (23%)<br>Coagulopathy 37 (19%)<br>Acute cardiac injury 33 (17%) |
| Zhang et al (2020). | Retrospective study with hospitalized                         | 3 | China<br>221 | Average 55<br>(39-66) | Male 108 (48.9%)<br>Female 113 (51.1%) | Hypertension 54 (24.4%)<br>Diabetes 22 (10.0%)<br>Cardiovascular disease 22 (10.0%)<br>Cerebrovascular disease 15 (6.8%)                                                                                                    | Arrhythmia 24 (10.9%)<br>Acute cardiac injury 17 (7.7%)                          |

|                     |                                                     |   |              |                    |                                      |                                                                                                                                                                                                         |                                                               |
|---------------------|-----------------------------------------------------|---|--------------|--------------------|--------------------------------------|---------------------------------------------------------------------------------------------------------------------------------------------------------------------------------------------------------|---------------------------------------------------------------|
|                     |                                                     |   |              |                    |                                      | Chronic obstructive pulmonary disease 6 (2.7%)<br>Chronic kidney disease 6 (2.7%)<br>Chronic liver disease 7 (3.2%)<br>Immunosuppression 3 (1.4%)                                                       |                                                               |
| Shang et al (2020). | Retrospective cohort study with severe hospitalized | 3 | China<br>113 | Median 66          | Male 73 (64%)<br>Female 40 (36%)     | Hypertension 50 (44%)<br>Diabetes 20 (17.7%)<br>Coronary heart disease 28 (24.8%)<br>Chronic obstructive pulmonary disease 5 (4%)<br>Tumor 8 (7.1%)<br>Heart disease 9 (8.0%)<br>Liver disease 8 (7.1%) | Acute myocardial injury 44 (38.9%)<br>Coagulopathy 21 (18.6%) |
| Deng et al (2020).  | Retrospective with hospitalized                     | 3 | China<br>112 | Average 65 (49-60) | Male 57 (50.9%)<br>Female 55 (49,1%) | Chronic obstructive pulmonary disease 4 (3.6%)<br>Hypertension 36 (32.1%)<br>Diabetes 19 (17.0%)<br>Coronary artery disease 15 (13.4%)<br>Atrial fibrillation 4 (3.6%)                                  | Myocardial injury 14 (12,5%)                                  |

Source: Authors.



143 Based on the analysis of the included studies and the extracted variables, the review gathered  
 144 3. 316 participants of the studies who were hospitalized, 50.87% male and 49.12% female, mean age  
 145 61 years, 13.08% with heart diseases (heart failure and coronary disease were included in heart  
 146 diseases), 15.10% diabetes, 31.72% hypertension, 3.5% pneumopathy (obstructive pulmonary disease  
 147 was included in pneumopathy), 3.13% renal diseases, 2.89% cancer, 0.09% immunosuppression,  
 148 0.57% liver disease, 0.15% autoimmune disease and 0.27% tuberculosis. This shows the most  
 149 frequent comorbidities are: Hypertension, Diabetes and Cardiac Diseases (table 2).

150 **Table 2 - Characteristics of participants, gender, mean age and comorbidities.**

|                        | Yes  |          | No   |          | Total |     |
|------------------------|------|----------|------|----------|-------|-----|
|                        | n    | %        | n    | %        | n     | %   |
| Female                 | 1629 | 49,12545 | 1687 | 50,87455 | 3316  | 100 |
| Male                   | 1687 | 50,87455 | 1629 | 49,12545 | 3316  | 100 |
| Age (average) 61 years |      |          |      |          | 3316  | 100 |
| Heart disease          | 434  | 13,08806 | 2882 | 86,91194 | 3316  | 100 |
| Diabetes               | 501  | 15,10856 | 2815 | 84,89144 | 3316  | 100 |
| Hypertension           | 1052 | 31,72497 | 2264 | 68,27503 | 3316  | 100 |
| Pneumopathy            | 119  | 3,588661 | 3197 | 96,41134 | 3316  | 100 |
| Chronic kidney disease | 104  | 3,136309 | 3212 | 96,86369 | 3316  | 100 |
| Cancer                 | 96   | 2,895054 | 3220 | 97,10495 | 3316  | 100 |
| Immunosuppression      | 3    | 0,09047  | 3313 | 99,90953 | 3316  | 100 |
| Liver disease          | 19   | 0,572979 | 3297 | 99,42702 | 3316  | 100 |
| Autoimmune disease     | 5    | 0,150784 | 3311 | 99,84922 | 3316  | 100 |
| Tuberculosis           | 9    | 0,271411 | 3307 | 99,72859 | 3316  | 100 |

151 Source: Authors.

152 Regarding the occurrence of cardiovascular complications associated with the SARS-CoV-2  
 153 infection, the following were highlighted: acute cardiac injury 17.09%, thromboembolism 4.73%,  
 154 heart failure 3.43%, arrhythmias 1.77%, and stroke 0.33% (Table 3).

155 **Table 3 - Occurrence of cardiovascular complications associated with SARS-CoV-2.**

|                       | Yes |          | No   |          | Total |     | P-value  |
|-----------------------|-----|----------|------|----------|-------|-----|----------|
|                       | n   | %        | n    | %        | n     | %   |          |
| General complications | 908 | 27,35%   | 2408 | 72,65%   | 3316  | 100 | < 0.0001 |
| <b>Types</b>          |     |          |      |          |       |     |          |
| Cardiac injury        | 567 | 17,09891 | 2749 | 82,90109 | 3316  | 100 |          |
| Thromboembolism       | 157 | 4,73462  | 3159 | 95,26538 | 3316  | 100 |          |
| Heart failure         | 114 | 3,437877 | 3202 | 96,56212 | 3316  | 100 | <0.0001* |
| Arrhythmias           | 59  | 1,779252 | 3257 | 98,22075 | 3316  | 100 |          |
| Stroke                | 11  | 0,331725 | 3305 | 99,66828 | 3316  | 100 |          |

#### 157 4. Discussion

158 Infection with SARS-CoV-2 may manifest with mild symptoms (85%) and severe symptoms  
159 (15%) (such as progression to SARS) with the potential to cause extrapulmonary damage, including  
160 cardiovascular damage that directly influences morbidity and mortality [31].

161 Thus, this study showed, from the analysis of studies with 3,316 hospitalized patients  
162 confirmed for COVID-19, that the occurrence of cardiovascular complications associated with  
163 SARS-CoV-2 was 27.35% of the following types: Acute cardiac injury 17.09%; Thromboembolism  
164 4.73%; Heart failure 3.43%; Arrhythmias 1.77%; Brain stroke 0,33%.

165 Acute cardiac injury was the most recurrent, and two meta-analysis studies showed its juto  
166 association with increased troponin and mortality, showing no association of the cardiac injury with  
167 higher risk of developing SARS. The studies highlight that early troponin monitoring is a preventive  
168 strategy for further myocardial injury[32,33]. This mechanism of injury is not yet clear to  
169 cardiologists, however, they work with hypotheses of viral invasion in the myocardium, similar to  
170 pulmonary invasion, via the connection of SARS-CoV-2 to the Angiotensin Converting Enzyme 2  
171 (ACE2), which is extensively present in the myocardium. Additionally, pneumonia can influence  
172 through systemic inflammatory responses, causing non-ischemic complications in the myocardium,  
173 mainly in the presence of cardiovascular comorbidities. It is also noted that the increased  
174 inflammatory activity is a risk factor for the rupture of coronary atherosclerotic plaques, which can  
175 cause the partial or total blockage of coronary arteries, causing myocardial ischemia and  
176 consequently hypoxia injury, characterizing Acute Myocardial Infarction. Causes of  
177 cardiomyopathy due to stress, physical injury, or pharmacological effects were not excluded.[34,35].

178 Research characterizes that the occurrence of acute cardiac injury is highly related to the  
179 presence of cardiovascular comorbidities (such as hypertension and diabetes), admission to an  
180 Intensive Care Unit and mortality. They highlight as a characteristic the increase of troponin type I  
181 associated with electrocardiographic and echocardiographic alterations, presenting segmental  
182 abnormality of the wall movement or reduction of the left ventricle ejection fraction [36]. Thus, the  
183 clinical presentation of the acute cardiac lesion may manifest as myocarditis or acute myocardial  
184 infarction, with thoracic pain and ST-segment elevation, requiring percutaneous cardiac  
185 procedure[37,38], which is an intervention that presents a risk of acute renal failure in hospitalized  
186 patients with comorbidities, due to the use of contrasts, and can increase hospitalization and  
187 mortality [39]. Showing that this complication requires procedures that can influence or enhance  
188 clinical conditions for a worse outcome.

189 Thromboembolism was the second most recurrent cardiovascular complication, described in  
190 the literature as Disseminated Intravascular Coagulation. In association with SARS-CoV-2, it is  
191 related to a storm of inflammatory cytokines, directly attacking the vascular endothelium with  
192 elevation of the fibrinogen and dimero-D markers (product of fibrin/fibrinogen degradation),  
193 causing thrombin dysregulation, exacerbated by inhibition of fibrinolysis. Thus the natural  
194 anticoagulants are compromised, resulting in the formation of thrombi, which can travel to a smaller  
195 vessel and obstruct, causing hypoxia. Thromboses can be venous or arterial, and can evolve to Deep  
196 Venous Thrombosis, Pulmonary Embolism, Ischemic Vascular Accident or acute myocardial  
197 infarction. These are serious complications associated with mortality. In this context, the heparin  
198 used in anticoagulant therapy was associated with better prognosis in some cases[40,41]. A study  
199 with 184 patients hospitalized in an intensive care unit confirmed for COVID-19, showed an  
200 incidence of 31% of thrombotic events, all received standard dose tromboprophylaxis[42]. Another  
201 study with 388 patients hospitalized by COVID-19 with thrombotic events in 28 cases (7.7%), being 8  
202 cases in intensive care unit and 20 cases in the infirmary, the complications represented: 4.4% venous  
203 thromboembolism, 2.8% Pulmonary Embolism, 0.3% Deep Venous Thrombosis, 2.5% ischemic  
204 stroke and 11.1% acute myocardial infarction and Acute Coronary Syndrome. All cases used  
205 tromboprophylaxis[43]. This study also showed the occurrence of stroke alone as a complication in

206 0.33% of cases, however, it is directly associated with thromboembolism associated with  
207 SARS-CoV-2, because the inflammatory response generates a hypercoagulable condition.

208 Heart failure represented the third cardiovascular complication, being a complex clinical  
209 syndrome, in which the myocardium has inability to adequately pump the blood to meet the  
210 metabolic needs of the tissues. This condition can be caused by structural or functional cardiac  
211 changes and presents characteristic signs and symptoms that result from a reduction in cardiac  
212 output and/or high filling pressures at rest or under stress[44]. Studies show that this complication  
213 occurs in patients without heart disease, mainly as a consequence of acute heart injury, since the  
214 damage to the myocardium has repercussions on its ventricular contraction function, resulting in a  
215 reduction in systolic function. Additionally, coagulopathies can cause pulmonary embolism and  
216 have repercussions in acute right ventricular failure. In addition, stress cardiomyopathy can also  
217 lead to classic ventricular decompensation, with high filling pressures and pulmonary edema. On  
218 the other hand, in the carrier of chronic heart failure, there is a great chance of decompensation of the  
219 disease, requiring hospitalization and intensive care, influencing mortality[45,46].

220 Another outstanding complication was cardiac arrhythmias, which are directly related to the  
221 following factors: acute cardiac injury, heart failure, drugs that prolong the cQT interval. Atrial  
222 fibrillation proved to be the most common type of arrhythmia, with the potential risk of thrombus  
223 formation, acute myocardial infarction and ischemic stroke, and antithrombotic therapy is debatable  
224 even in cases without risk factors. Arrhythmias are also related to higher risks of heart instability,  
225 cardiac arrest and death[47].

226 This review showed that acute cardiac injury is the main cardiovascular complication  
227 associated with SARS-CoV-2 infection, causing several instabilities in cardiopulmonary functions,  
228 and also influencing other cardiovascular complications, in patients without chronic diseases and  
229 with chronic diseases.

## 230 5. Conclusions

231 The main cardiovascular complications associated with SARS-CoV-2 in hospitalized patients  
232 were several, among them: acute cardiac injury, thromboembolism, heart failure, arrhythmias and  
233 ischemic stroke, with a mean age of 61 years, with the most prevalent comorbidities, hypertension,  
234 diabetes and heart diseases.

235 The evidence on the association of cardiovascular complications and SARS-CoV-2 provides  
236 information for the implementation of preventive measures and better therapeutic management,  
237 with the objective of minimizing hospital stay, morbidity and mortality.

238 **Author Contributions:** D.M.S and K.V.B.L. conceived the study. D.M.S, K.V.B.L. and T.M.R.L.U. designed the  
239 search strategy. D.M.S. conducted searching of databases. Y.C.R., D.M.S., J.C.D.G. and A.L da S.F. screened the  
240 records. D.M.S and K.V.B.L. screened the full texts. A.L.S dos .S. completed all data extraction, and R.J. de P.S e  
241 G and L.N.G.C.L. conducted quality checks. L.N.G.C.L. drafted the full manuscript, and all authors reviewed  
242 and approved final submission. All authors have read and agreed to the published version of the manuscript

243 **Funding:** Conselho Nacional de Desenvolvimento Científico e Tecnológico (CNPQ). Coordenação de  
244 Aperfeiçoamento de Pessoal de Nível Superior (CAPES). Instituto Evandro Chagas (IEC).

245 **Conflicts of Interest:** The authors declare no conflict of interest.

## 246 References

- 247 [1] Sardinha DM, Silva AGI da, Gomes SG, Pamplona FC, Gorayeb ALDS, Ferreira MFDC, et al.  
248 Cardiovascular Risk Factors in Nurses Teachers. *Cardiol Angiol An Int J* 2020;9:9–17.  
249 <https://doi.org/10.9734/ca/2020/v9i130125>.
- 250 [2] Costa GF, Sardinha DM, Oliveira VMLP, Barata FS, Silva PHV da, Mafra INP, et al. Nursing Care for  
251 Patients Submitted to Coronary Transluminal Angioplasty: An Integrative Review. *Cardiol Angiol An Int*  
252 *J* 2020;9:18–26. <https://doi.org/10.9734/ca/2020/v9i130126>.
- 253 [3] Massa KHC, Duarte YAO, Chiavegatto Filho ADP. Análise da prevalência de doenças cardiovasculares e

- 254 fatores associados em idosos, 2000-2010. *Cien Saude Colet* 2019;24:105-14.  
255 <https://doi.org/10.1590/1413-81232018241.02072017>.
- 256 [4] OMS OM da S. OPAS/OMS Brasil - Doenças cardiovasculares. PahoOrg 2017.  
257 [https://www.paho.org/bra/index.php?option=com\\_content&view=article&id=5253:doencas-cardiovasculares&Itemid=1096](https://www.paho.org/bra/index.php?option=com_content&view=article&id=5253:doencas-cardiovasculares&Itemid=1096) (accessed July 11, 2020).
- 259 [5] Blackburn R, Zhao H, Pebody R, Hayward A, Warren-Gash C. Laboratory-Confirmed Respiratory  
260 Infections as Predictors of Hospital Admission for Myocardial Infarction and Stroke: Time-Series Analysis  
261 of English Data for 2004-2015. *Clin Infect Dis* 2018;67:8-17. <https://doi.org/10.1093/cid/cix1144>.
- 262 [6] Davidson JA, Warren-Gash C. Cardiovascular complications of acute respiratory infections: current  
263 research and future directions. *Expert Rev Anti Infect Ther* 2019;17:939-42.  
264 <https://doi.org/10.1080/14787210.2019.1689817>.
- 265 [7] Velavan TP, Meyer CG. The COVID-19 epidemic. *Trop Med Int Heal* 2020;25:278-80.  
266 <https://doi.org/10.1111/tmi.13383>.
- 267 [8] Lima LNGC, De Sousa MS, Lima KVB. As descobertas genômicas do SARS-CoV-2 e suas implicações na  
268 pandemia de COVID-19. *J Heal Biol Sci* 2020;8:1.  
269 <https://doi.org/10.12662/2317-3076jhbs.v8i1.3232.p1-9.2020>.
- 270 [9] BULUT C, KATO Y. Epidemiology of COVID-19. *TURKISH J Med Sci* 2020;50:563-70.  
271 <https://doi.org/10.3906/sag-2004-172>.
- 272 [10] Sun P, Lu X, Xu C, Sun W, Pan B. Understanding of COVID-19 based on current evidence. *J Med Virol*  
273 2020;92:548-51. <https://doi.org/10.1002/jmv.25722>.
- 274 [11] Brasil M da S. Definição de Caso e Notificação. Portal Do Gov Bras 2020;1-9.  
275 <https://coronavirus.saude.gov.br/definicao-de-caso-e-notificacao> (accessed July 4, 2020).
- 276 [12] Bastos LS, Niquini RP, Lana RM, Villela DAM, Cruz OG, Coelho FC, et al. COVID-19 e hospitalizações por  
277 SRAG no Brasil: uma comparação até a 12ª semana epidemiológica de 2020. *Cad Saude Publica* 2020;36.  
278 <https://doi.org/10.1590/0102-311x00070120>.
- 279 [13] Madabhavi I, Sarkar M, Kadakol N. COVID-19. A review. *Monaldi Arch Chest Dis* 2020;90.  
280 <https://doi.org/10.4081/monaldi.2020.1298>.
- 281 [14] Martins JDN, Sardinha DM, Silva RR da, Lima KVB, Lima LNGC. As implicações da COVID-19 no sistema  
282 cardiovascular: prognóstico e intercorrências. *J Heal Biol Sci* 2020;8:1.  
283 <https://doi.org/10.12662/2317-3076jhbs.v8i1.3355.p1-9.2020>.
- 284 [15] Liberati A, Altman DG, Tetzlaff J, Mulrow C, Gøtzsche PC, Ioannidis JPA, et al. The PRISMA Statement  
285 for Reporting Systematic Reviews and Meta-Analyses of Studies That Evaluate Health Care Interventions:  
286 Explanation and Elaboration. *PLoS Med* 2009;6:e1000100. <https://doi.org/10.1371/journal.pmed.1000100>.
- 287 [16] Donato H, Donato M. Stages for undertaking a systematic review. *Acta Med Port* 2019;32:227-35.  
288 <https://doi.org/10.20344/amp.11923>.
- 289 [17] Santos CMDC, Pimenta CADM, Nobre MRC. A estratégia PICO para a construção da pergunta de  
290 pesquisa e busca de evidências. *Rev Latino-Am Enferm* 2007;15:508-11.  
291 <https://doi.org/10.1590/S0104-11692007000300023>.
- 292 [18] Oxford Centre for Evidence-Based Medicine. Evaluation of the quality of evidence. CEBEM 2020.  
293 <https://www.cebm.net/> (accessed September 18, 2020).
- 294 [19] Li X, Xu S, Yu M, Wang K, Tao Y, Zhou Y, et al. Risk factors for severity and mortality in adult COVID-19  
295 inpatients in Wuhan. *J Allergy Clin Immunol* 2020;146:110-8. <https://doi.org/10.1016/j.jaci.2020.04.006>.
- 296 [20] Wang L, He W, Yu X, Hu D, Bao M, Liu H, et al. Coronavirus disease 2019 in elderly patients:

297 Characteristics and prognostic factors based on 4-week follow-up. *J Infect* 2020;80:639–45.  
298 <https://doi.org/10.1016/j.jinf.2020.03.019>.

299 [21] Inciardi RM, Adamo M, Lupi L, Cani DS, Di Pasquale M, Tomasoni D, et al. Characteristics and outcomes  
300 of patients hospitalized for COVID-19 and cardiac disease in Northern Italy. *Eur Heart J* 2020;41:1821–9.  
301 <https://doi.org/10.1093/eurheartj/ehaa388>.

302 [22] Shi S, Qin M, Cai Y, Liu T, Shen B, Yang F, et al. Characteristics and clinical significance of myocardial  
303 injury in patients with severe coronavirus disease 2019. *Eur Heart J* 2020;41:2070–9.  
304 <https://doi.org/10.1093/eurheartj/ehaa408>.

305 [23] Li Y, Li M, Wang M, Zhou Y, Chang J, Xian Y, et al. Acute cerebrovascular disease following COVID-19: a  
306 single center, retrospective, observational study. *Stroke Vasc Neurol* 2020.  
307 <https://doi.org/10.1136/svn-2020-000431>.

308 [24] Shi S, Qin M, Shen B, Cai Y, Liu T, Yang F, et al. Association of Cardiac Injury With Mortality in  
309 Hospitalized Patients With COVID-19 in Wuhan, China. *JAMA Cardiol* 2020;5:802.  
310 <https://doi.org/10.1001/jamacardio.2020.0950>.

311 [25] Guo T, Fan Y, Chen M, Wu X, Zhang L, He T, et al. Cardiovascular Implications of Fatal Outcomes of  
312 Patients With Coronavirus Disease 2019 (COVID-19). *JAMA Cardiol* 2020.  
313 <https://doi.org/10.1001/jamacardio.2020.1017>.

314 [26] Yang L, Liu J, Zhang R, Li M, Li Z, Zhou X, et al. Epidemiological and clinical features of 200 hospitalized  
315 patients with corona virus disease 2019 outside Wuhan, China: A descriptive study. *J Clin Virol*  
316 2020;129:104475. <https://doi.org/10.1016/j.jcv.2020.104475>.

317 [27] Zhou F, Yu T, Du R, Fan G, Liu Y, Liu Z, et al. Clinical course and risk factors for mortality of adult  
318 inpatients with COVID-19 in Wuhan, China: a retrospective cohort study. *Lancet* 2020;395:1054–62.  
319 [https://doi.org/10.1016/S0140-6736\(20\)30566-3](https://doi.org/10.1016/S0140-6736(20)30566-3).

320 [28] Zhang G, Hu C, Luo L, Fang F, Chen Y, Li J, et al. Clinical features and short-term outcomes of 221 patients  
321 with COVID-19 in Wuhan, China. *J Clin Virol* 2020;127:104364. <https://doi.org/10.1016/j.jcv.2020.104364>.

322 [29] Shang Y, Liu T, Wei Y, Li J, Shao L, Liu M, et al. Scoring systems for predicting mortality for severe  
323 patients with COVID-19. *EClinicalMedicine* 2020:100426. <https://doi.org/10.1016/j.eclinm.2020.100426>.

324 [30] Deng Q, Hu B, Zhang Y, Wang H, Zhou X, Hu W, et al. Suspected myocardial injury in patients with  
325 COVID-19: Evidence from front-line clinical observation in Wuhan, China. *Int J Cardiol* 2020;311:116–21.  
326 <https://doi.org/10.1016/j.ijcard.2020.03.087>.

327 [31] Cespedes M da S, Souza JCRP de. Sars-CoV-2: A clinical update - II. *Rev Assoc Med Bras* 2020;66:547–57.  
328 <https://doi.org/10.1590/1806-9282.66.4.547>.

329 [32] Li J-W, Han T-W, Woodward M, Anderson CS, Zhou H, Chen Y-D, et al. The impact of 2019 novel  
330 coronavirus on heart injury: A Systematic review and Meta-analysis. *Prog Cardiovasc Dis* 2020.  
331 <https://doi.org/10.1016/j.pcad.2020.04.008>.

332 [33] Santoso A, Pranata R, Wibowo A, Al-Farabi MJ, Huang I, Antariksa B. Cardiac injury is associated with  
333 mortality and critically ill pneumonia in COVID-19: A meta-analysis. *Am J Emerg Med* 2020.  
334 <https://doi.org/10.1016/j.ajem.2020.04.052>.

335 [34] Shi S, Qin M, Yang B. Coronavirus Disease 2019 (COVID-19) and Cardiac Injury –Reply. *JAMA Cardiol*  
336 2020. <https://doi.org/10.1001/jamacardio.2020.2456>.

337 [35] Madjid M, Safavi-Naeini P, Solomon SD, Vardeny O. Potential Effects of Coronaviruses on the  
338 Cardiovascular System. *JAMA Cardiol* 2020;5:831. <https://doi.org/10.1001/jamacardio.2020.1286>.

339 [36] Martins-Filho PR, Barreto-Filho JAS, Santos VS. Biomarcadores de Lesão Miocárdica e Complicações

340 Cardíacas Associadas à Mortalidade em Pacientes com COVID-19. *Arq Bras Cardiol* 2020;115:273–7.  
341 <https://doi.org/10.36660/abc.20200372>.

342 [37] Nishiga M, Wang DW, Han Y, Lewis DB, Wu JC. COVID-19 and cardiovascular disease: from basic  
343 mechanisms to clinical perspectives. *Nat Rev Cardiol* 2020;17:543–58.  
344 <https://doi.org/10.1038/s41569-020-0413-9>.

345 [38] Gupta A, Madhavan M V., Sehgal K, Nair N, Mahajan S, Sehrawat TS, et al. Extrapulmonary  
346 manifestations of COVID-19. *Nat Med* 2020;26:1017–32. <https://doi.org/10.1038/s41591-020-0968-3>.

347 [39] Sardinha DM, Simor A, de Oliveira Moura LD, Silva AGI da, Batista Lima KV, Dias Garcez JC, et al. Risk  
348 Factors for Acute Renal Failure after Cardiac Catheterization Most Cited in the Literature: An Integrative  
349 Review. *Int J Environ Res Public Health* 2020;17. <https://doi.org/10.3390/ijerph17103392>.

350 [40] Tang N, Li D, Wang X, Sun Z. Abnormal coagulation parameters are associated with poor prognosis in  
351 patients with novel coronavirus pneumonia. *J Thromb Haemost* 2020;18:844–7.  
352 <https://doi.org/10.1111/jth.14768>.

353 [41] Biembengut ÍV, de Souza T de ACB. Coagulation modifiers targeting SARS-CoV-2 main protease Mpro for  
354 COVID-19 treatment: an in silico approach. *Mem Inst Oswaldo Cruz* 2020;115.  
355 <https://doi.org/10.1590/0074-02760200179>.

356 [42] Klok FA, Kruip MJHA, van der Meer NJM, Arbous MS, Gommers DAMPJ, Kant KM, et al. Incidence of  
357 thrombotic complications in critically ill ICU patients with COVID-19. *Thromb Res* 2020;191:145–7.  
358 <https://doi.org/10.1016/j.thromres.2020.04.013>.

359 [43] Lodigiani C, Iapichino G, Carenzo L, Cecconi M, Ferrazzi P, Sebastian T, et al. Venous and arterial  
360 thromboembolic complications in COVID-19 patients admitted to an academic hospital in Milan, Italy.  
361 *Thromb Res* 2020;191:9–14. <https://doi.org/10.1016/j.thromres.2020.04.024>.

362 [44] Sardinha DM, Neiva Assis L de M e, Amoedo AS, Gonçalves KR de O, Melo RHD, Lima CAS, et al.  
363 Nursing Diagnoses in Heart Failure: Integrative Review. *Cardiol Angiol An Int J* 2020;1–9.  
364 <https://doi.org/10.9734/ca/2020/v9i230129>.

365 [45] Bader F, Manla Y, Atallah B, Starling RC. Heart failure and COVID-19. *Heart Fail Rev* 2020.  
366 <https://doi.org/10.1007/s10741-020-10008-2>.

367 [46] Parohan M, Yaghoubi S, Seraji A. Cardiac injury is associated with severe outcome and death in patients  
368 with Coronavirus disease 2019 (COVID-19) infection: A systematic review and meta-analysis of  
369 observational studies. *Eur Hear J Acute Cardiovasc Care* 2020;204887262093716.  
370 <https://doi.org/10.1177/2048872620937165>.

371 [47] Kochav SM, Coromilas E, Nalbandian A, Ranard LS, Gupta A, Chung MK, et al. Cardiac Arrhythmias in  
372 COVID-19 Infection. *Circ Arrhythm Electrophysiol* 2020;13:e008719.  
373 <https://doi.org/10.1161/CIRCEP.120.008719>.

374
